# Supplementary material for: Mapping and engineering RNA-controlled architecture of the multiphase nucleolus
Source: PubMed Central journal article supplement — bioRxiv. 2024 Sep 29:2024.09.28.615444. Preprint. [Version 1] doi: 10.1101/2024.09.28.615444 (PMC11463421; doi:10.1101/2024.09.28.615444), 2024-09-29

## Supplementary Note 1: kinetic model of transcription and processing of pre-ribosomal RNA

In this Supplementary Note, we present a chemical kinetics model to describe the transcription and processing of pre-ribosomal RNA (pre-rRNA) in the 5eU pulse-chase experiments. Fitting the model to the sequencing and imaging data allows us to extract effective reaction rates of transcription and processing, which can be used to infer steady-state properties such as the relative abundance of rRNA precursors.

### Kinetic model for 5eU incorporation into pre-rRNA

In the 5eU pulse-chase experiments, the total amount of pre-rRNA can be measured by imaging the total 5eU intensity in the nucleus (Figure 1). We model the production of 5eU-labeled pre-rRNA with a two-step process: first, 5eU needs to be uptaken by the cell into the nucleus; second, the available 5eU is incorporated into pre-rRNA during transcription. Both steps are described by linear kinetics:

$$\begin{aligned}\frac{dc_0}{dt} &= k_0\theta(-t)\theta(t + t_{\text{pulse}}) - k_1c_0 \\ \frac{dc_1}{dt} &= k_1c_0\end{aligned}$$

where  $c_0$  is the amount of nuclear 5eU available for transcription, and  $c_1$  is the amount of 5eU in pre-rRNA.  $k_0$  and  $k_1$  are the reaction rates of 5eU uptake and transcription, respectively. The Heaviside step functions  $\theta(t)$  and  $\theta(t + t_{\text{pulse}})$  describe the pulse of 5eU, during  $t \in (-t_{\text{pulse}}, 0)$ .

The model can be solved analytically to obtain the total 5eU signal in the pre-rRNA:

$$c_1(t) = \begin{cases} 0 & t < -t_{\text{pulse}} \\ \frac{k_0}{k_1} \left( -1 + e^{-k_1(t+t_{\text{pulse}})} + k_1(t + t_{\text{pulse}}) \right) & -t_{\text{pulse}} \leq t < 0 \\ \frac{k_0}{k_1} \left( k_1 t_{\text{pulse}} - e^{-k_1 t} + e^{-k_1(t+t_{\text{pulse}})} \right) & t \geq 0 \end{cases}. \text{ [Eq.1]}$$

Eq.(1) agrees well with the total 5eU signal measured by imaging, with fitting parameters  $k_0 = 0.052 \pm 0.006 \text{ min}^{-1}$  and  $k_1 = 0.051 \pm 0.026 \text{ min}^{-1}$  (Figure 1). The fit allows us to extract the rate of transcription (of rRNA labeled by 5eU)  $k_0c_0$ , with  $c_0$  given by

$$c_0(t) = \begin{cases} 0 & t < -t_{\text{pulse}} \\ \frac{k_0}{k_1} \left(1 - e^{-k_1(t+t_{\text{pulse}})}\right) & -t_{\text{pulse}} \leq t < 0 \\ \frac{k_0}{k_1} e^{-k_1 t} \left(1 - e^{-k_1 t_{\text{pulse}}}\right) & t \geq 0 \end{cases}. \quad [\text{Eq. 2}]$$

## Kinetic model for rRNA processing

Next, we consider the kinetics of rRNA processing as measured by sequencing in the pulse-chase experiments. For simplicity, we assume the processes to be limited by reaction rather than diffusion, which allows ignoring spatial degrees of freedom. We model each cleavage step as a first order reaction with rate  $k_i$ , with  $i = 2,3,4,5$ .  $k_2$  corresponds to the cleavage of junctions 01 and 02,  $k_3$  junctions 1 and 2,  $k_4$  junction 3', and  $k_5$  junction 4'. The abundance of individual pre-rRNA species is represented by  $c_i$ , with  $i$  labeling the next cleavage step. The kinetic model is given by

$$\begin{aligned} \frac{dc_2}{dt} &= k_1 c_0 - k_2 c_2, & \frac{dc_3}{dt} &= k_2 c_2 - k_3 c_3, \\ \frac{dc_4}{dt} &= k_3 c_3 - k_4 c_4, & \frac{dc_5}{dt} &= k_4 c_4 - k_5 c_5, \\ \frac{dc_6}{dt} &= k_5 c_5, \end{aligned} \quad [\text{Eq. 3}]$$

where  $c_1 = \sum_{i=2}^5 c_i$  is the total amount of pre-rRNA. We fit the model to the cleavage fraction of each junction as measured by 5eU-sequencing:

$$\begin{aligned} f_{01} &= \frac{c_3}{c_2 + c_3}, & f_{02} &= 1 - \frac{c_2}{c_1}, & f_{1,2} &= 1 - \frac{c_2 + c_3}{c_1}, \\ f_{3'} &= 1 - \frac{c_2 + c_3 + c_4}{c_1} = \frac{c_5 + c_6}{c_1}, & f_{4'} &= \frac{c_6}{c_1}, \end{aligned}$$

where  $f_i$  is the fraction of junction  $i$  cleaved as measured by sequencing. Junctions 1 and 2 are averaged to obtain  $f_{1/2}$ . Junction 3' is not used in the fit. The definition of  $f_{01}$  is slightly different from all the other fractions because the cleavage of junction 01 can no longer be detected once junction 1 is cut, while the cleavage of junction 2 is detectable in all the later species.

The kinetic model provides an excellent fit to the data (Figure 2). The best-fit parameters are  $k_2 = 0.061 \text{ min}^{-1}$ ,  $k_3 = 0.035 \text{ min}^{-1}$ ,  $k_4 = 0.046 \text{ min}^{-1}$ , and  $k_5 = 0.046 \text{ min}^{-1}$ . This also allows us to estimate the relative abundance of individual pre-rRNA species at steady state:

$$c_2^{SS} : c_3^{SS} : c_4^{SS} : c_5^{SS} \sim k_2^{-1} : k_3^{-1} : k_4^{-1} : k_5^{-1} = 19\% : 32\% : 25\% : 25\%. \quad [\text{Eq. 4}]$$

The abundance of 18S is slightly different since its processing does not involve cutting junctions 3' and 4'. We estimate that it is exported at rate  $\tilde{k}_4 \sim 30 \text{ min}^{-1}$  after the cleavage of junctions 1 and 2. The relative abundance of 18S is then given by

$$\tilde{c}_2^{SS} : \tilde{c}_3^{SS} : \tilde{c}_4^{SS} \sim k_2^{-1} : k_3^{-1} : \tilde{k}_4^{-1} = 22\% : 38\% : 40\%.$$

This provides an estimate of the fraction of processed versus unprocessed 18S in the multiphase reaction-diffusion model (Figure 5 in the main text).

## Deconvolving the radial distribution of pre-rRNA

The kinetic model allows us to deconvolve the pre-rRNA distribution measured by 5eU imaging into the distribution of different pre-rRNA species. Let  $\phi_i(r)$  be the steady-state radial distribution of pre-rRNA species  $i$  (e.g.  $i$  is a particular cleavage state), which is normalized by  $\int_0^\infty \phi_i(r) 4\pi r^2 dr = 1$ . Assuming that pre-rRNA processing is reaction limited (i.e. diffusion within each phase is much faster than cleavage), the radial distribution of the total pre-rRNA (since 5eU-imaging labels all the pre-rRNA species)  $\phi(r, t)$  is given by a linear combination of the individual species:

$$\phi(r, t) = \frac{\sum_i c_i(t) \phi_i(r)}{\sum_i c_i(t)} = \sum_i \gamma_i(t) \phi_i(r),$$

where  $\gamma_i(t) = \frac{c_i(t)}{\sum_i c_i(t)}$  is the fraction of pre-rRNA species  $i$  at time  $t$ .  $\phi(r, t)$  is normalized by  $\int_0^\infty \phi(r, t) 4\pi r^2 dr = 1$  for all  $t$ .

Thus, the steady-state distribution of individual species can be obtained by solving a constrained non-negative least squares problem:

$$\min_{\phi_i(r)} \sum_t \int_0^\infty (\phi(r, t) - \sum_i \gamma_i(t) \phi_i(r))^2 4\pi r^2 dr, \quad [\text{Eq.5}]$$

subject to  $\int_0^\infty \phi_i(r) 4\pi r^2 dr = 1$  and  $\phi_i(r) \geq 0$  for  $i$  running over all pre-rRNA species.

Here, we divide rRNA into early ( $\phi_2$ ), middle ( $\phi_3$ ), late ( $\phi_4 + \phi_5$ ), and cytoplasmic ( $\phi_6$ ) species. The relative abundance  $\gamma_i(t)$  is predicted by the kinetic model (Figure 3A).  $\phi(r, t)$  is measured by 5eU imaging (Figure 3B). Solving the optimization problem gives the radial distribution function  $\phi_i(r)$  (Figure 3C) and probability distribution function  $4\pi r^2 \phi_i(r)$  (Figure 3D), which demonstrate that pre-rRNA processing correlates with its outward movement.

A similar deconvolution can be done to the RNA FISH measurements. The normalized FISH signal for junction  $i$  is given by

$$y_i(r) = \frac{\sum_{\{j \leq i\}} c_j^{ss} \phi_j(r)}{\sum_{\{j \leq i\}} c_j^{ss}}, \text{ [Eq. 6]}$$

where  $c_j^{ss}$  is the steady-state abundance of species  $j$  given in Eq. (4). Solving Eq. (6) for  $\phi_i(r)$  gives the spatial distribution of intermediates predicted by FISH, which can be compared with that from 5eU-seq and imaging (Figure 4).

## Figures

Figure 1: Fitting the total 5eU signal in the nucleus to the model (Eq. (1)). The fit only used data in the first two hours after the pulse.

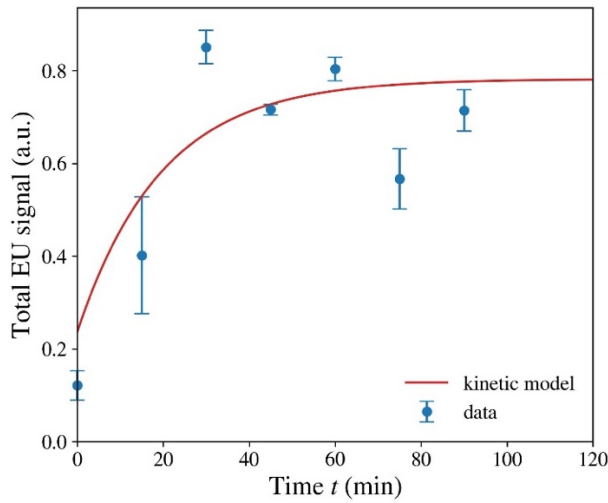

Figure 2: The kinetic model (Eq. (3)) captures the cleavage fraction of nascent rRNA as measured by 5eU-sequencing.

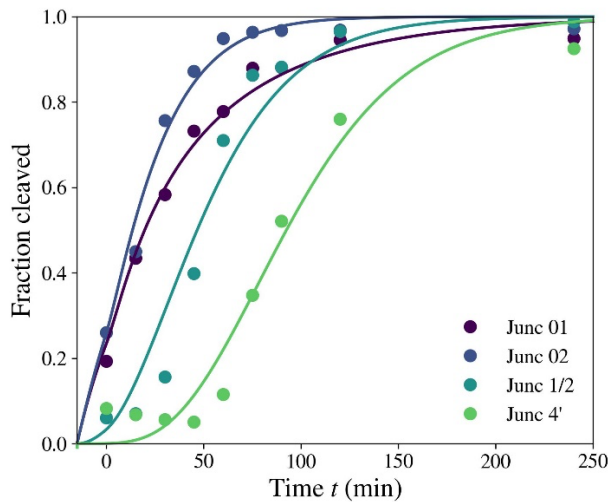

Figure 3: Deconvolving the radial distribution of nascent rRNA

(A) rRNA abundance  $\gamma_i(t)$  as a function of time, obtained from the kinetic model.

(B) the radial distribution of nascent rRNA at different times, obtained by normalizing the 5eU imaging data.

(C–D) the radial distribution function  $\phi_i(r)$  (C) and probability distribution function  $4\pi r^2 \phi_i(r)$  (D) of individual rRNA species, inferred by solving the optimization problem Eq. (5).

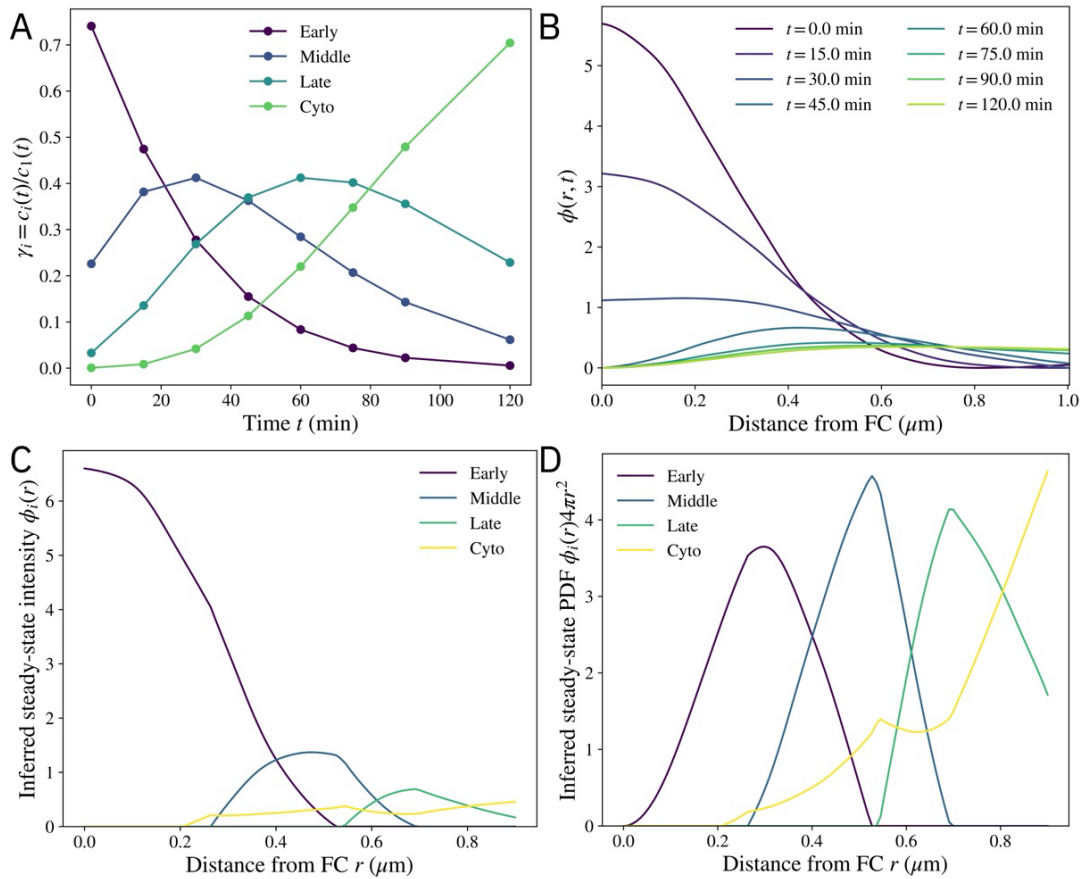

Figure 4: The radial distribution of early, middle, and late pre-rRNA species as inferred from 5eU-imaging (top) and FISH (bottom). For 5eU-imaging, the distribution is inferred by solving the optimization problem Eq. (5). For FISH, the spatial distribution is obtained by solving Eq. (6) for  $\phi_i(r)$ . The radius of the circles is  $0.9 \mu m$ .

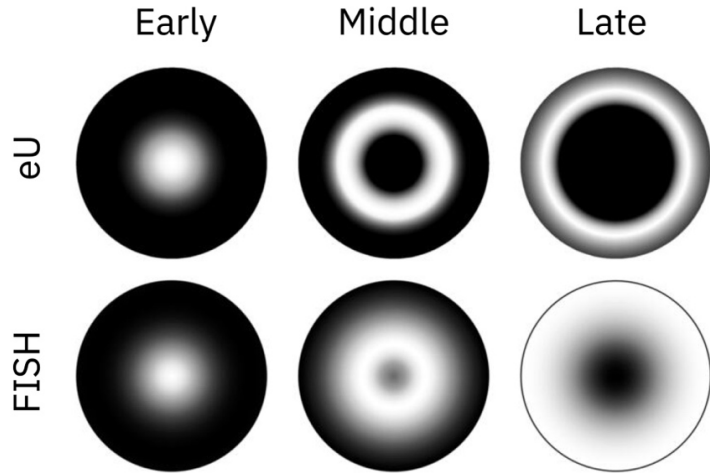

Supplement: media-6.pdf [file media-6.pdf]
